# Supplementary material
Source: publisher figshare collection journal article supplement (https://frontiersin.figshare.com/ndownloader/files/14398355)
Supplement: Supplementary file [file 14398355]

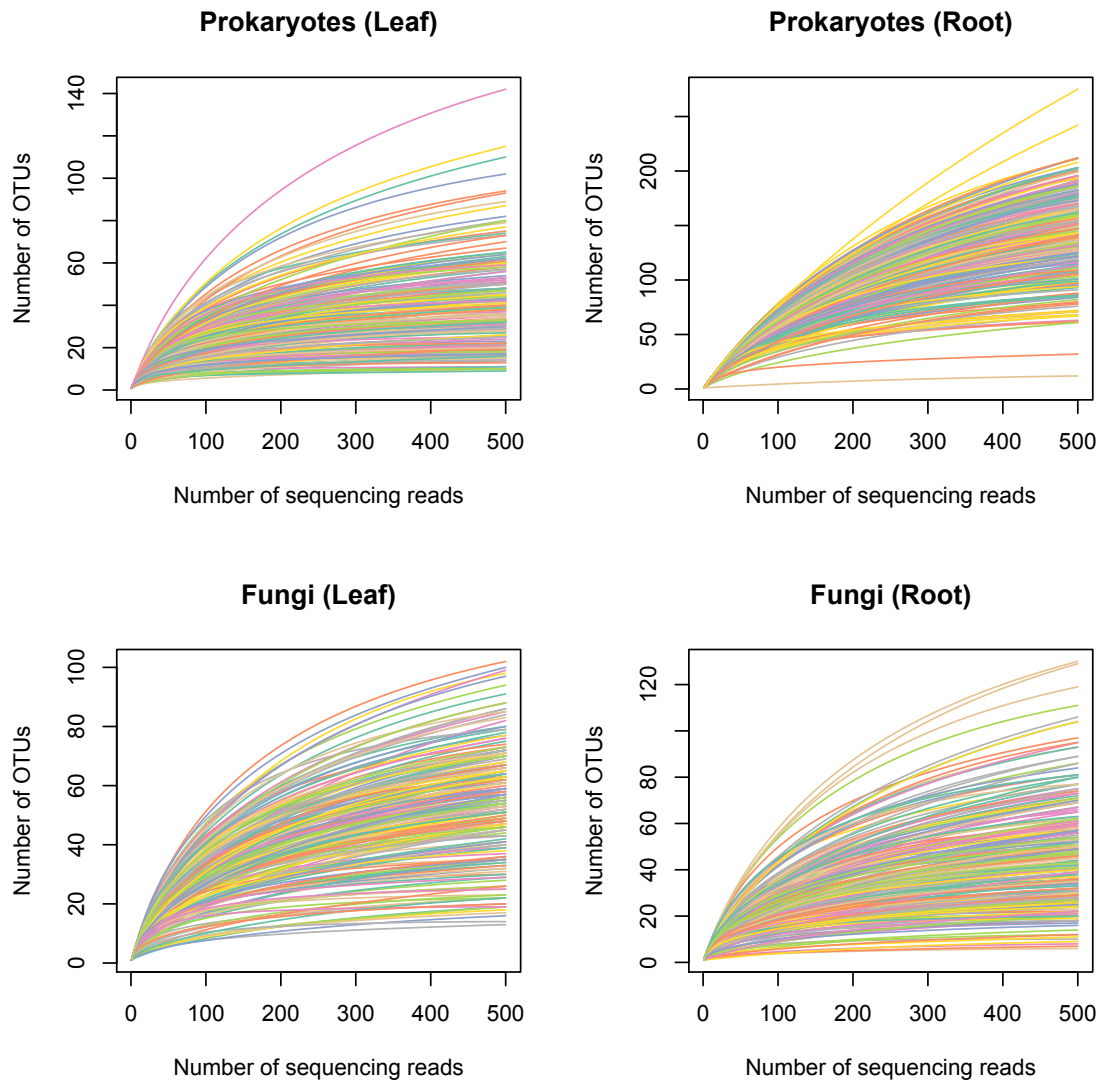

**Supplementary Figure 1.** Relationships between the number of sequencing reads and that of OTUs.
